# Supplementary material
Source: PubMed Central journal article supplement (PMC4293239)

Supplementary Figure 1

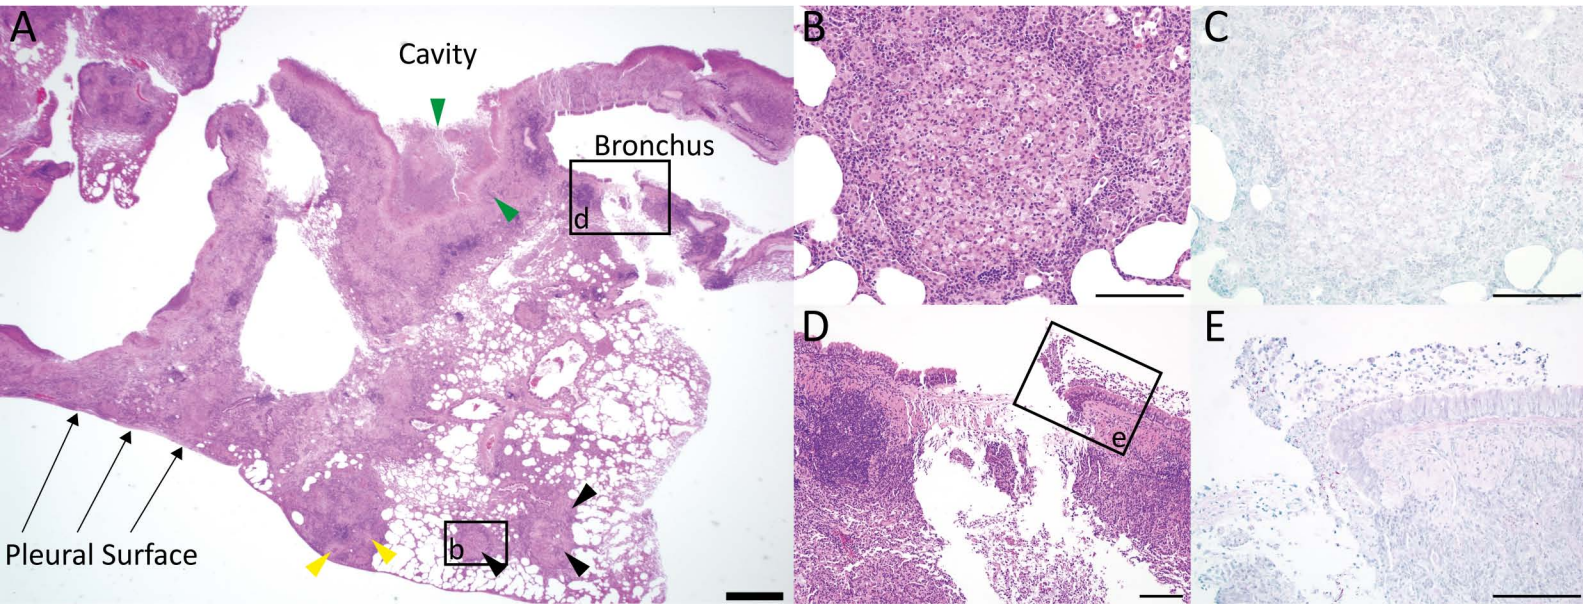

Supplementary Figure 2

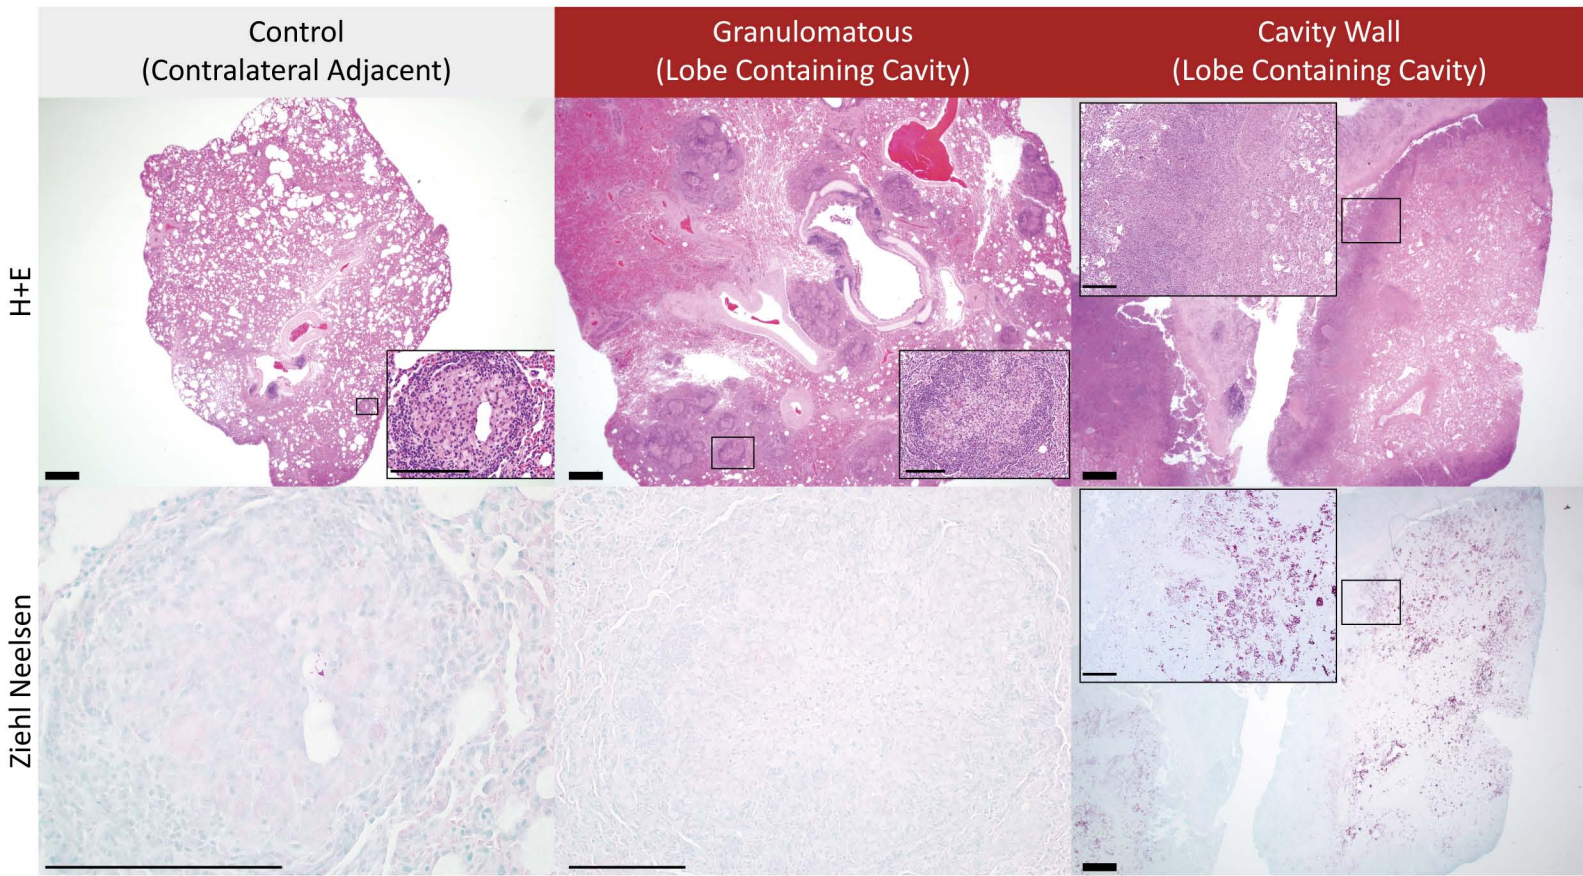



Supplementary Figure 3

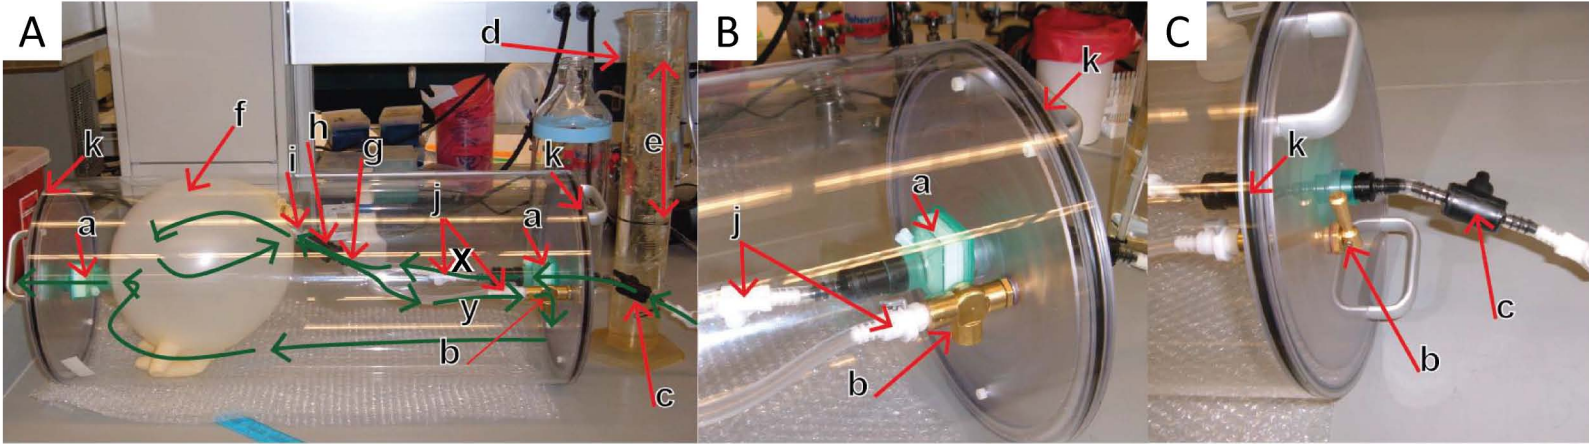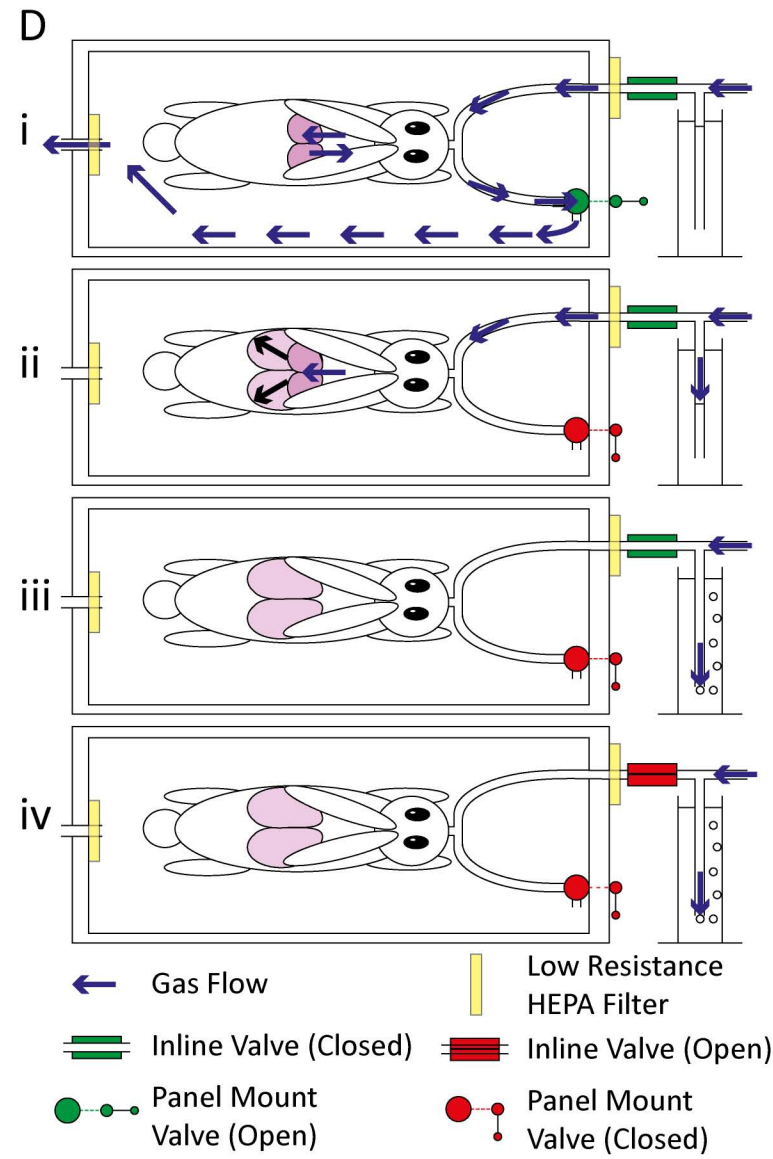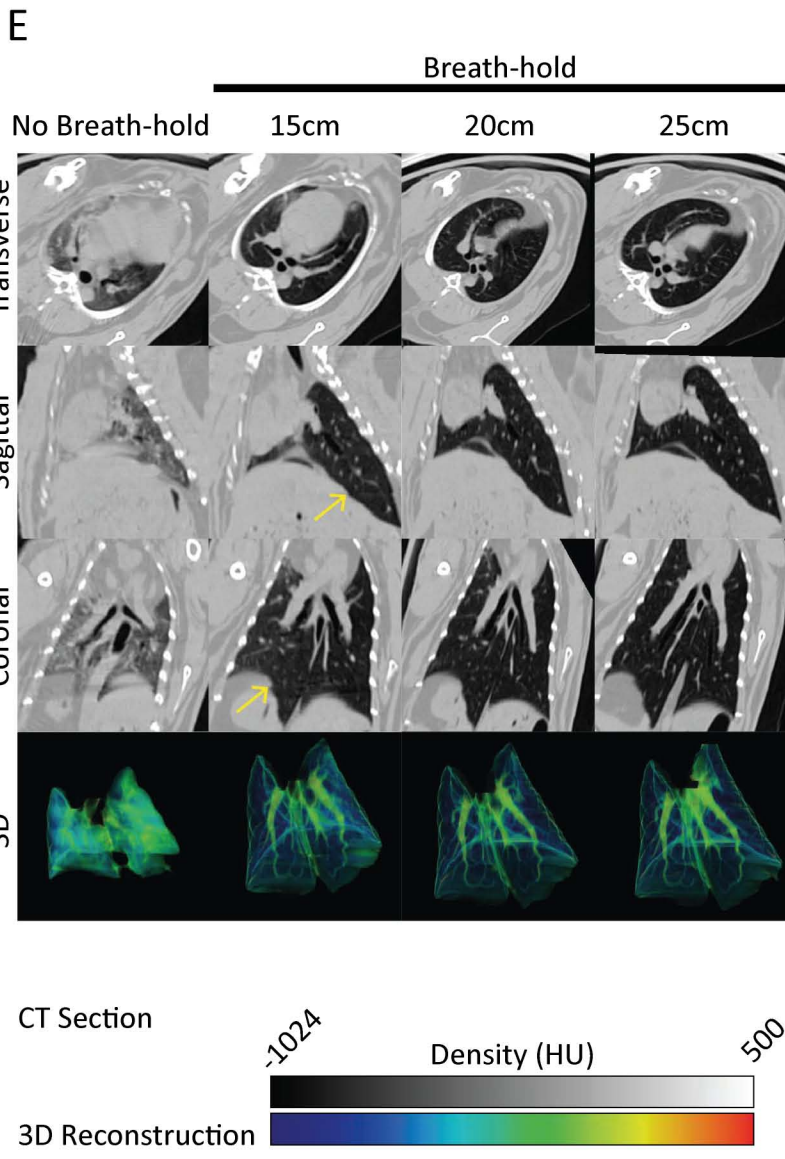



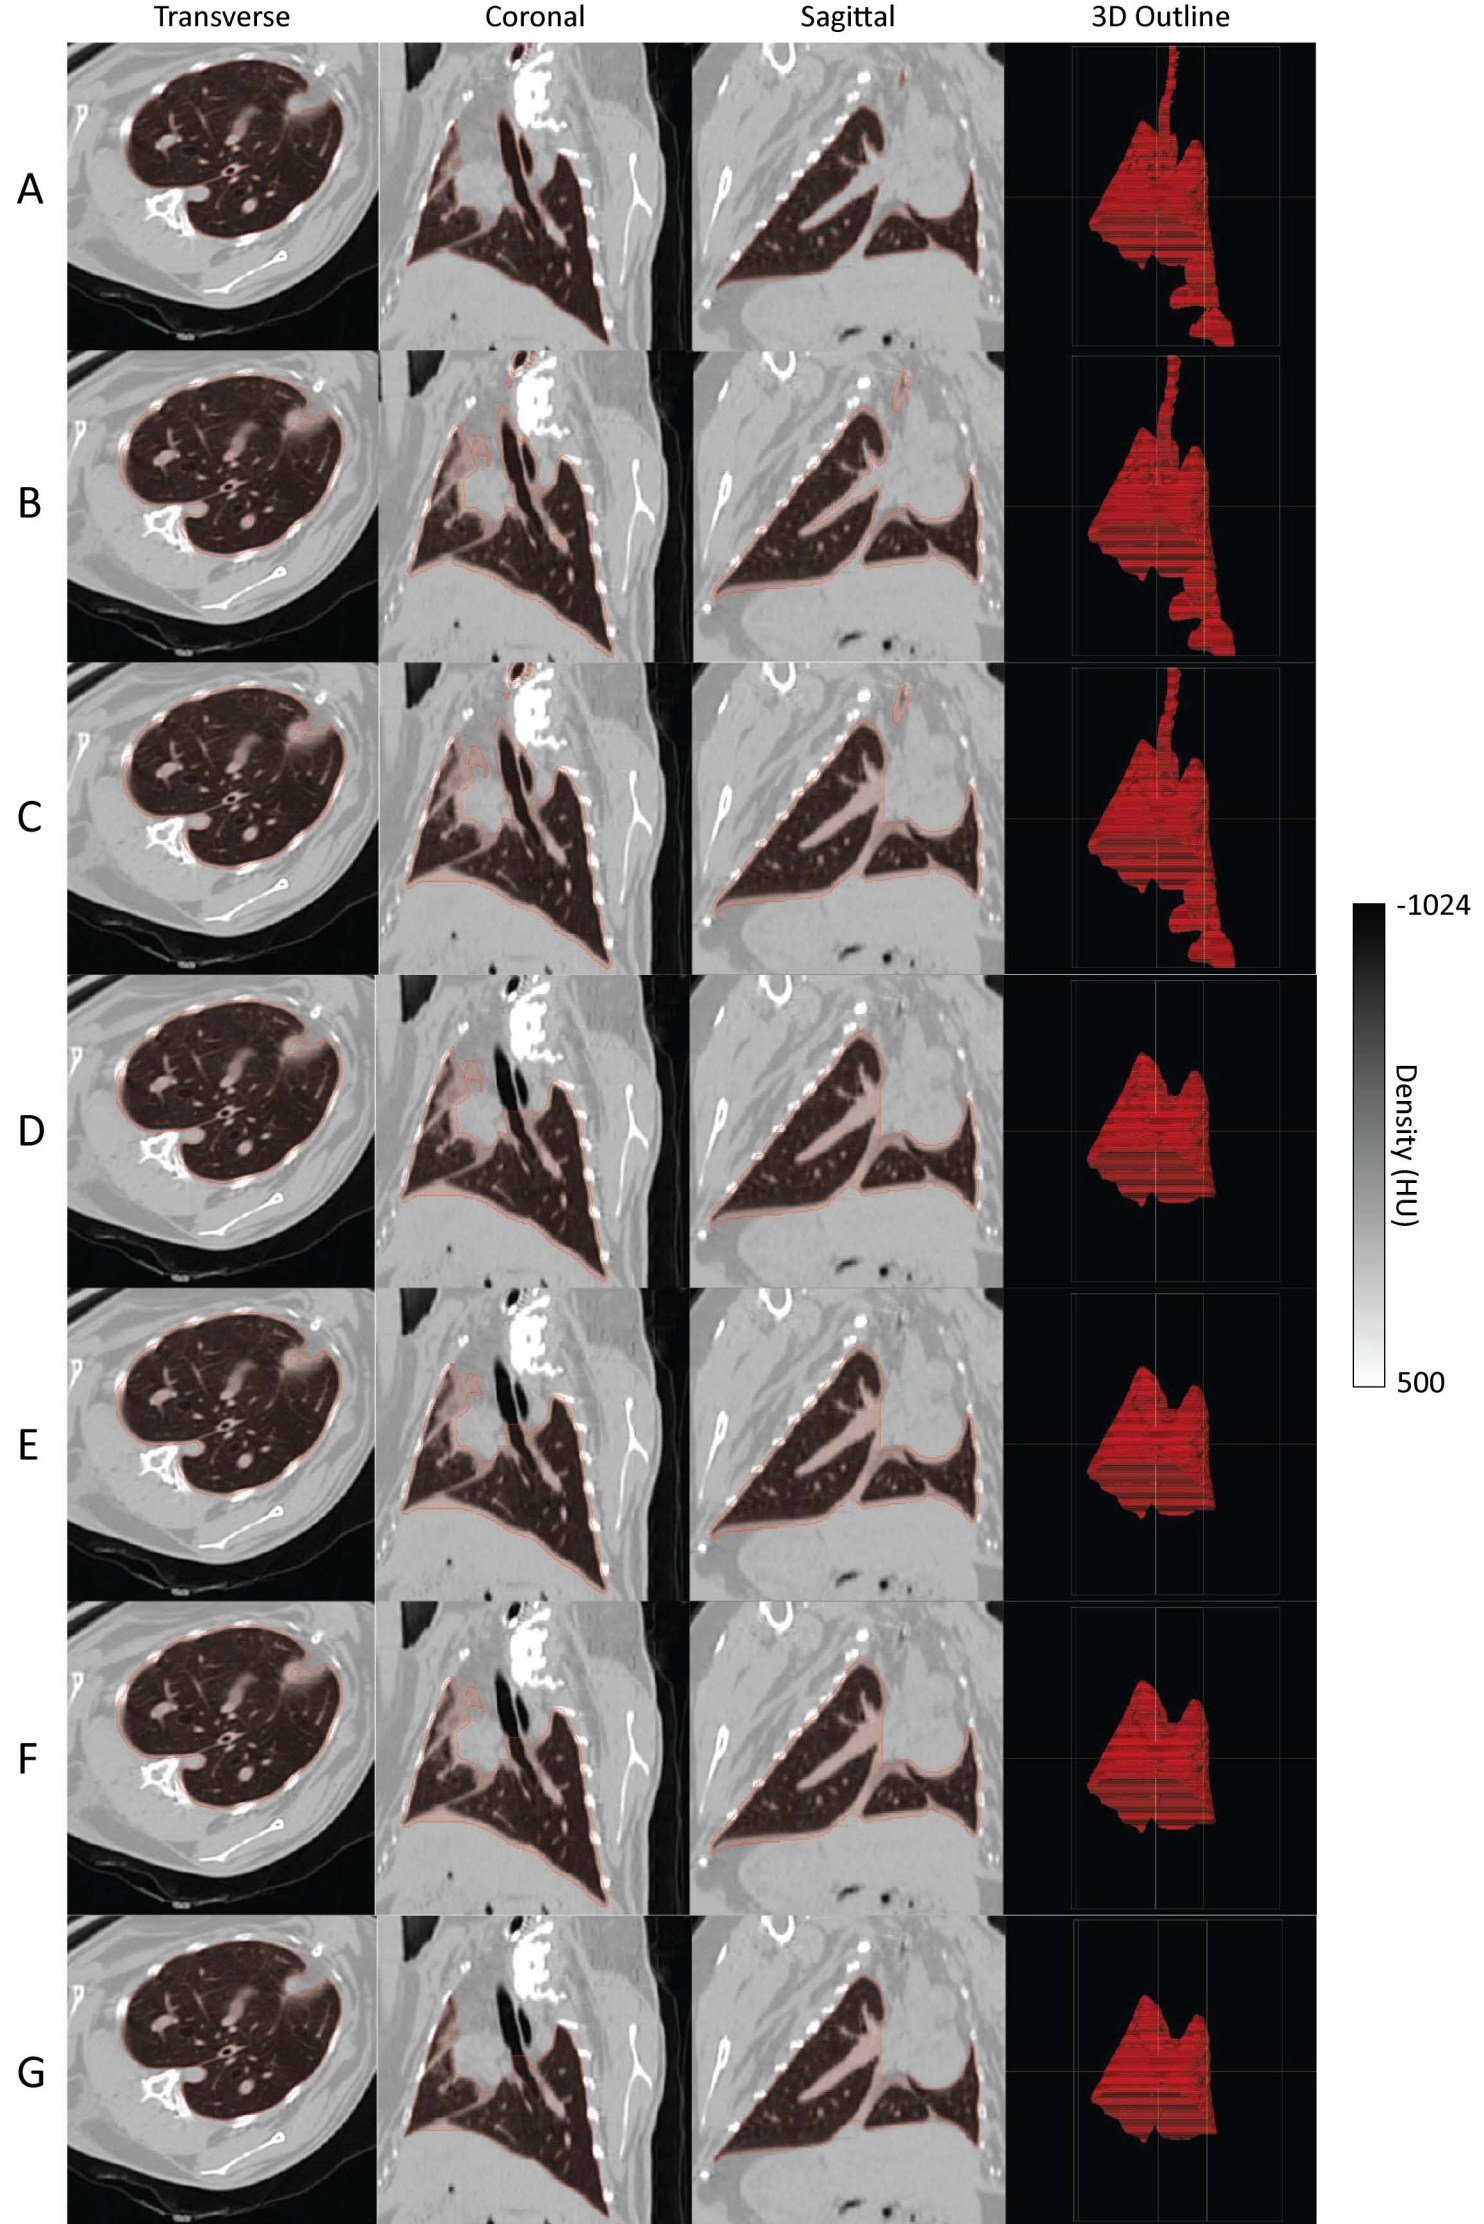

## Supplementary Figure 5

$$\textit{Tissue weight} = \left( 1 - \frac{\text{CT}}{-1000} \right) \times \textit{Total volume}$$

**A**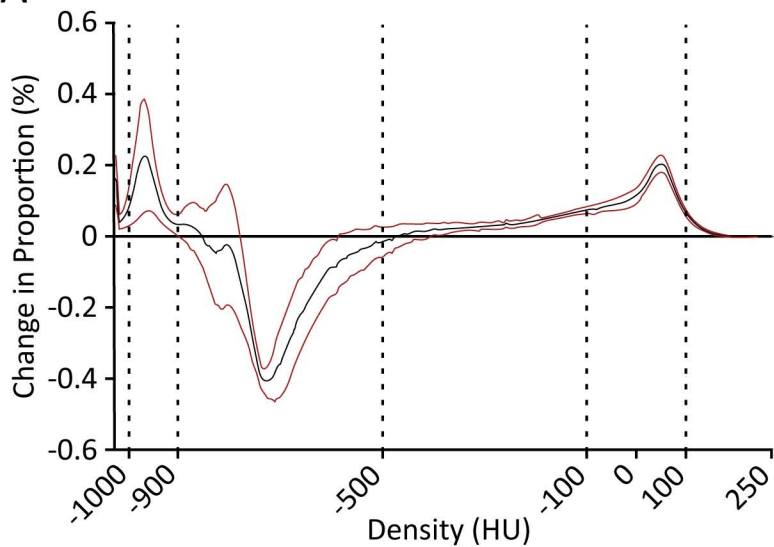**B**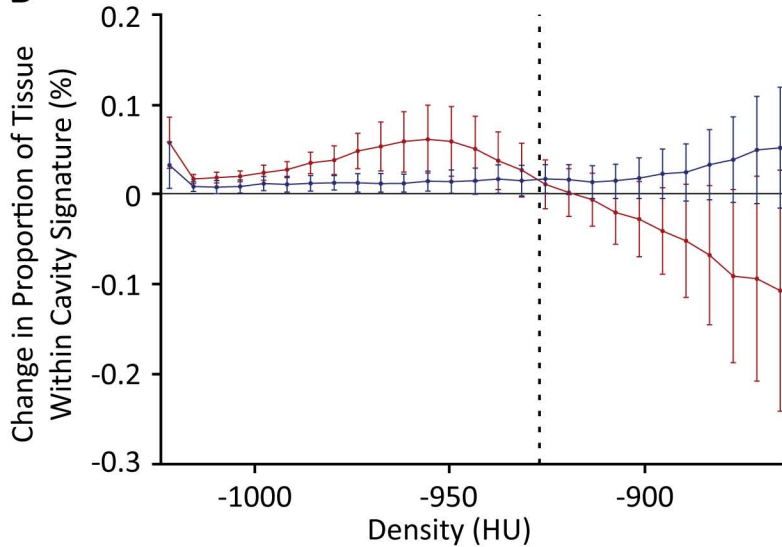**C**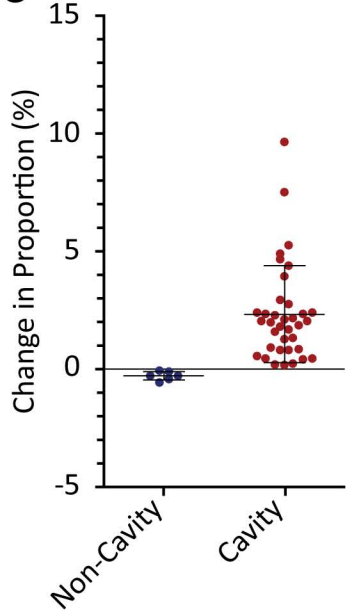**D**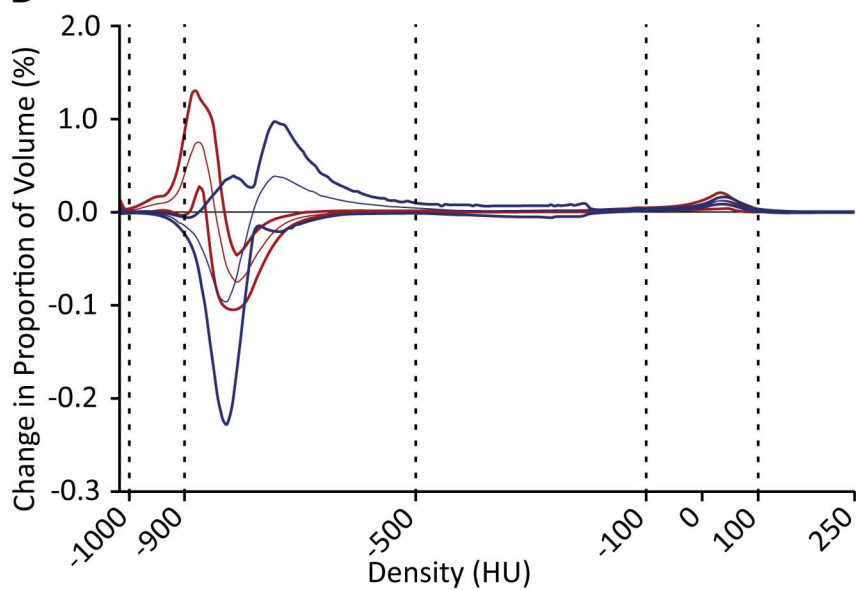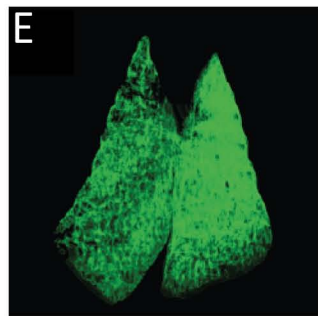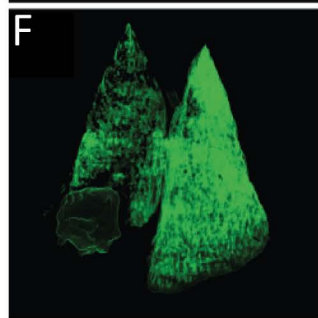

Supplementary Figure 7

A

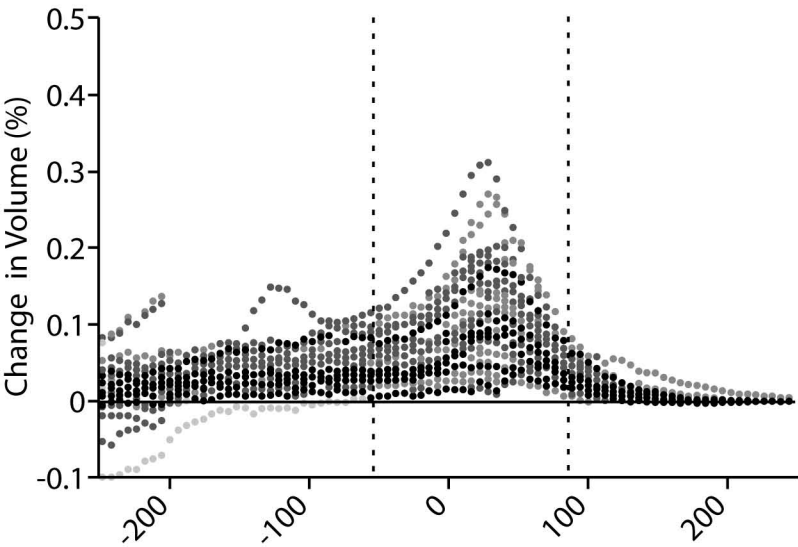

B

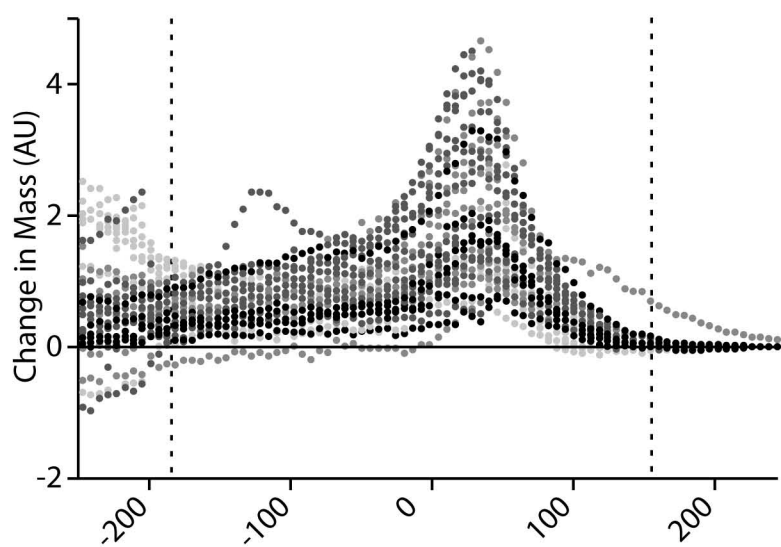

**A**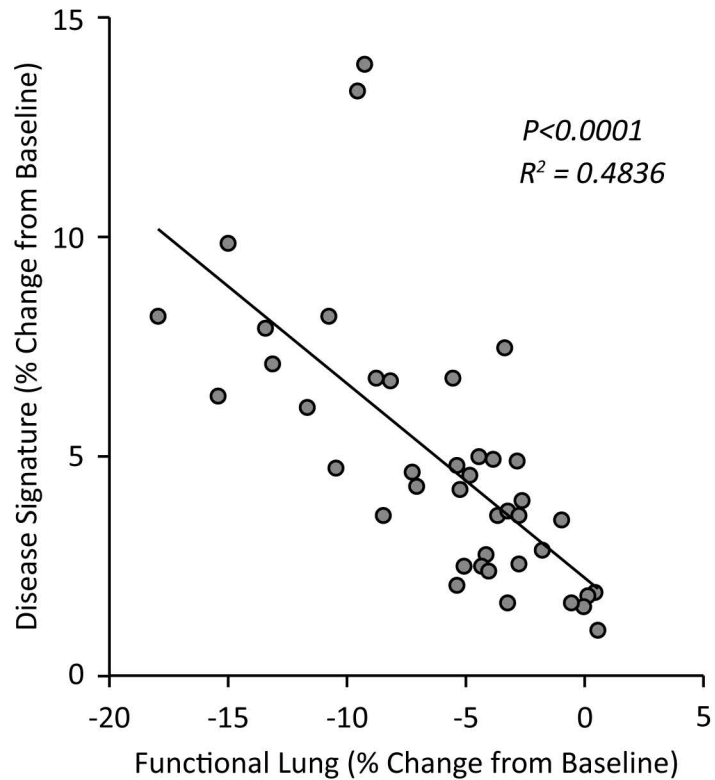**B**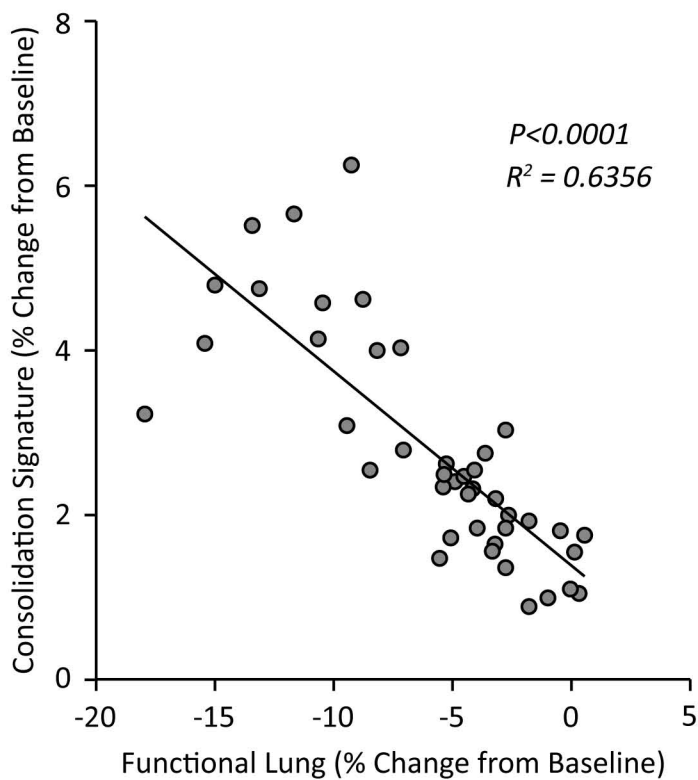

Supplement: NIHMS626584-supplement-Supp_FigureS1-S8.pdf [file NIHMS626584-supplement-Supp_FigureS1-S8.pdf]
