# Supplementary material
Source: PubMed Central journal article supplement (PMC4293239)
Supplement: NIHMS626584-supplement-Supp_TableS1-S2.pdf [file NIHMS626584-supplement-Supp_TableS1-S2.pdf]

Supplementary Table 1

| <b>Rabbit</b> | <b>Dimension 1 (mm)</b> | <b>Dimension 2 (mm)</b> | <b>Thickness</b> | <b>Impression</b> | <b>Volume (mm<sup>3</sup>)</b> |
|---------------|-------------------------|-------------------------|------------------|-------------------|--------------------------------|
| <b>A</b>      | 6.4                     | 8.0                     | 0.2              | +                 | 42.89                          |
| <b>B</b>      | 9.6                     | 9.1                     | 1.0              | +                 | 219.56                         |
| <b>C</b>      | 6.0                     | 5.5                     | 1.0              | +/-               | 138.23                         |
| <b>D</b>      | 12.0                    | 13.1                    | 0.5              | ++                | 658.48                         |
| <b>E</b>      | 5.6                     | 5.6                     | 0.8              | +/-               | 65.68                          |
| <b>F</b>      | 13.3                    | 12.9                    | 0.6              | ++                | 574.94                         |
| <b>G</b>      | 8.9                     | 8.2                     | 1.0              | +/-               | 183.42                         |
| <b>H</b>      | 10.3                    | 10.4                    | 0.1              | ++                | 448.70                         |
| <b>I</b>      | 3.4                     | 2.7                     | 0.1              | +/-               | 3.85                           |
| <b>J</b>      | 5.8                     | 5.4                     | 0.1              | +/-               | 13.12                          |
| <b>K</b>      | 7.9                     | 6.8                     | 0.3              | +/-               | 67.51                          |
| <b>L</b>      | 12.3                    | 14.4                    | 2.1              | ++                | 1558.03                        |

A

| GENE  | GENE ID   | GENE ID        | Forward Primer         | Reverse Primer         |
|-------|-----------|----------------|------------------------|------------------------|
| ACTB  | 100009272 | NM_001101683.1 | CGCTTCCGTTGCCCCGAG     | GCCGCCCCGACAGCACCGT    |
| MMP1  | 100009110 | NM_001171139.1 | ACCTTCCCAAATCCCAGTCAG  | GATTTGCCCGCATGTAGAACC  |
| MMP2  | 100009000 | NM_001082209.1 | CCGCAGTGATGGCAAGATGTG  | GGGCTGCCACGAGGAACA     |
| MMP3  | 100009111 | NM_001082280.1 | TGGCCATCTCTTCCTTCAGCA  | TGCTTCTGGGTAACCAGCTTG  |
| MMP7  | 100357971 | XM_002708573.1 | CCACAGTGGGAACAGGCTCA   | CCAGTTATAGGCAGGCCAAAGA |
| MMP8  | 100339790 | XM_002708421.1 | ATTTTATTTCCCTGTTCTGGCC | TTCATAGCCATTCAGAGC     |
| MMP9  | 100008993 | NM_001082203.1 | TCGCCGAGATAGGGAACAAGC  | GTCGGCGATGAGGAAGGG     |
| MMP10 | 100101603 | XM_002708561.1 | GGAGGTGATACGCAAGCCCA   | GCATCTCTTGGCAGATCTGGTG |
| MMP12 | 100009559 | NM_001082771.1 | CTCGATGTGGAGTGCCTGATGT | GCTCATGTCTGGAGTGT      |
| MMP13 | 100008685 | NM_001082037.1 | ACTCATTGCTGGTCCCTGCC   | TCCCGCAGGATTCAGAGGA    |
| MMP14 | 100009598 | NM_001082232.2 | GATCGATGCCGCTCTTCTG    | CGCTGTCCACTGCCCTGA     |
| TIMP1 | 100009047 | NM_001195682.1 | GGCCTTCTGCAACTCCGA     | TGCCCCAAGGCGTCAAAT     |
| TIMP2 | 100009047 | XM_002723776.1 | AGGTGGACTCTGGGAACGACA  | CGGGGCCTTTGAACATCT     |
| TIMP3 | 100008689 | NM_001195682.1 | ACGCCTTCTGCAACTCCGACAT | ACGTGGGGCATCTTGGTGA    |
| TIMP4 | 100008691 | NM_001195690.1 | ACACTCAGAGAATGATCCGG   | CACCACAGAGAGAAGAGTCA   |

B

| GENE  | Product Sequence                                                                                                                                       |
|-------|--------------------------------------------------------------------------------------------------------------------------------------------------------|
| ACTB  | CGCTTCCGTTGCCCCGAGGCGCTCTTCCAGCCCTCCTTCTGGGCATGGAGTCGTGTGGCATCCACGAGACCACCTTCAA<br>CTCGATCATGAAGTGCAGCTGGACATCCGCAAGGACCTGTACGCCAACACGGTGCTGTCCGGGCGGC |
| MMP1  | ACCTTCCCAAATCCCAGTCAGCCAGTAGGCCACAGACCCCAAAGTGTGTGATAGTAACTGACCTTTGATGCTATAA<br>CCACAATTCGGGGAGAAATAATGTTCTTTAAAGACAGTTTCTACATGCGGGCAAATC              |
| MMP2  | CCGCAGTGATGGCAAGATGTGGTGCAGCTCAACCACTACGACGATGACCGCAAGTGGGGCTTCTGCCCTGACCAA<br>GTTACAGCCTGTTCCCTCGTGGCAGCCC                                            |
| MMP3  | TGGCCATCTCTTCCTTCAGCAGTGGATGCTGCATATGAAGTTATTAGCAGGGATACTGTTTTCATTTTTAAAGGAACTCAGT<br>TCTGGGCCATTAGAGGAAATGAGGTACAAGCTGGTTACCCAAGAAGCA                 |
| MMP7  | CCACAGTGGGAACAGGCTCAGGACTATCTCAAGAGATTTTATTTTCATGGCTTGAAATCAAAGGAAGTCGATAGCTTAGA<br>AACCAGACTGAAGGAGATGCAGAAGTTCTTTGGCCTGCCTATAACTGG                   |
| MMP8  | N/D                                                                                                                                                    |
| MMP9  | TCGCCGAGATAGGGAACAAGCTGCATGTCTTCAAGGATGGGAGGTACTGGCGTTTCTCCGAGGGCAGTGGCGCCGGCC<br>GCAGGGCCCCTTCCCTCATCGCCGAC                                           |
| MMP10 | GGAGGTGATACGCAAGCCAGGTGTGGCGTTCCCGATGTTGGTCACTTCACTTCCCTGGCACCCCAAAGTGGACA<br>AACTAACTTACAGGATTGTGAATTACACACCAGATCTGCCAAGAGATGCT                       |
| MMP12 | CTCGATGTGGAGTGCCTGATGTTTATCATTTCAAACCATGCCAGGGAGACCAGTATGGAGGAAACATTACATCACCTACA<br>GAATCAAAAATTACACTCCAGACATGAAGC                                     |
| MMP13 | ACTCATTGCTGGTCCCTGCCCTCCTCAACAGTAACGAGGATGATGATTTGTCCGAGGAAGACTTCCAGTTTGCAGAGAG<br>CTACCTGAGATCATACTACCATCCTCTGAATCCTGCGGGA                            |
| MMP14 | GATCGATGCCGCTCTTCTGGATGCCAATGGAAAGACCTACTTCTTCCGGGGAAACAAGTACTACCGATTCAACGAGG<br>AGCTCAGGGCAGTGGACAGCG                                                 |
| TIMP1 | GGCCTTCTGCAACTCCGACCTTGTGCATCAGGGCCAAGTTTGTGGGGGCTCCAGAAGTCAATCATACTACCTTGTACCAGC<br>GTTATGAAATCAAGACAACCAAGATGTTCAAAGGATTTGACGCCTTGGGGCA              |
| TIMP2 | AGGTGGACTCTGGGAACGACATCTACGGCAACCCCATCAAGAGGATCCAGTATGAGATCAAGCAGATCAAGATGTTCAA<br>AGCCCCG                                                             |
| TIMP3 | ACGCCTTCTGCAACTCCGACATCGTGATCCGGGCCAAGGTGGTGGGGAAGAAGCTGGTGAAGGAAGGGCCCTTCGGCA<br>CGATGGTCTACACCGTCAAGCAGATGAAGATGTACCGAGGCTTACCAAGATGCCCCACGT         |
| TIMP4 | ACACTCAGAGAATGATCCGGTATGAAATCAAACAGATAAAGATGTTTAAAGGGTTTGAGAAAATCAAGGATGTTTCAGTAC<br>ATCTATACACCTTTTACTCTTCTCTGTGGTG                                   |
